# Supplementary material for: Identifying and Managing Malnutrition, Frailty and Sarcopenia in the Community: A Narrative Review
Source: MDPI journal article supplement (doi:10.3390/nu13072316), 2021-07-05
Supplement: s1 [file s1]

**Table S1.** Malnutrition, frailty and sarcopenia prevalence and risk in community-living older adults<sup>^</sup>

| Author, year                   | Setting and sample                                                     | Participants <sup>a</sup>                                                             | Screening tool(s)                                                  | Prevalence                                                                                                                     |
|--------------------------------|------------------------------------------------------------------------|---------------------------------------------------------------------------------------|--------------------------------------------------------------------|--------------------------------------------------------------------------------------------------------------------------------|
| <b>Malnutrition studies</b>    |                                                                        |                                                                                       |                                                                    |                                                                                                                                |
| Winter et al., 2013 [21]       | Victoria, adults aged $\geq 75$ y                                      | $N = 225$<br>48% men, $81.3 \pm 4.3$ y                                                | MNA <sup>®</sup> -SF                                               | Malnourished: 1%<br>At risk: 16%                                                                                               |
| McElnay et al., 2012 [20]      | Hawke's Bay, Māori and non-Māori adults aged $\geq 65$ y               | $N = 473$<br>47% men, 74y                                                             | SCREEN <sup>©</sup> II                                             | High risk: 32.8%<br>Moderate risk: 23.7%                                                                                       |
| Wham et al. (2011a) [22]       | Auckland, adults aged 80–85y                                           | $N=51$<br>29% men, $82.4 \pm 1.7$ y                                                   | SCREEN <sup>©</sup> II                                             | Mean score: $52.2 \pm 6.7$<br>High risk: 31%<br>Moderate/low risk: 69%                                                         |
| Wham et al. (2011b) [23]       | Rotorua, Whakatane and Opotiki, Māori and non-Māori adults aged 75–85y | $N = 108$<br>44% men, $76.6 \pm 1.8$ y (Maori);<br>$85.2 \pm 0.6$ y (Non-Maori)       | SCREEN <sup>©</sup> II                                             | Score: $46.4 \pm 5.8$ (living alone)<br>Score: $50.3 \pm 5.1$ (living with others)<br>High risk: 52%<br>Moderate/low risk: 48% |
| Rist et al, 2012 [24]          | Victoria, adults aged $\geq 65$ y                                      | $N = 235$<br>47% men; $82 \pm 7.0$ y                                                  | MNA <sup>®</sup>                                                   | At risk: 34.5%<br>Malnourished: 8.1%                                                                                           |
| Stricher et al, 2018 [25]      | New Zealand*, Māori and non-Māori adults aged $\geq 65$ y              | $N = 209$<br>48% men, $84.6 \pm 0.5$ y                                                | BMI $< 20$ kg/m <sup>2</sup> or $\geq 10\%$ unintended weight loss | Malnourished: 17.2% (3y incidence)                                                                                             |
| Watson et al., 2010 [26]       | Christchurch, adults aged $\geq 70$ y                                  | $N = 152$<br>38% men, 79.5y                                                           | SCREEN <sup>©</sup>                                                | At risk: 23%<br>High risk: 31%                                                                                                 |
| Craven et al, 2018 [27]        | Queensland, adults aged $\geq 65$ y                                    | $N = 77$<br>60% men, $73.3 \pm 5.1$ y                                                 | SCREEN <sup>©</sup> II, SF-12                                      | High risk: 40%<br>Moderate risk: 26%                                                                                           |
| Wham, Maxted et al., 2015 [28] | The Northland and Bay of Plenty, adults aged 75–79y                    | $N = 67$<br>44% men, $77 \pm 1.5$ y                                                   | SCREEN <sup>©</sup> II                                             | Score: $47.8 \pm 5.3$<br>High risk: 63%                                                                                        |
| North et al., 2018 [29]        | Five North Island locations, Māori and non-Māori adults aged 80–90y    | $N = 653$<br>63% men, 82(5)y <sup>b</sup> (Māori);<br>85(1)y <sup>b</sup> (Non-Māori) | SCREEN <sup>©</sup> II                                             | At risk: 54%<br>High risk (Māori): 49%<br>High risk (non-Māori): 38%                                                           |
| Chatindiara et al., 2019 [30]  | Auckland, Māori/Pacific and non-Māori adults aged $\geq 65$ y          | $N = 257$<br>47% men, 79(7)y <sup>b</sup>                                             | MNA <sup>®</sup> -SF                                               | At risk: 11%<br>Malnourished: 1%                                                                                               |
| Isenring et al., 2013 [31]     | Brisbane, adults aged $\geq 65$ y                                      | $N = 254$<br>52% men, $74.3 \pm 6.0$ y                                                | MNA <sup>®</sup> -SF                                               | At risk: 3.9% (1y incidence)                                                                                                   |
| <b>Frailty studies</b>         |                                                                        |                                                                                       |                                                                    |                                                                                                                                |
| Gnjidic et al., 2012 [33]      | Sydney, men aged $\geq 70$ y                                           | $N = 1662$<br>100% men, $76.9 \pm 5.4$ y                                              | FFP                                                                | Frail: 9%<br>Pre-frail: 41%                                                                                                    |

|                                       |                                          |                                                                                         |                               |                                                                                                                |
|---------------------------------------|------------------------------------------|-----------------------------------------------------------------------------------------|-------------------------------|----------------------------------------------------------------------------------------------------------------|
| Thompson et al., 2018 [11]            | South Australia, adults aged ≥ 65y       | N = 8804<br>14% men, 80 (79–82)y <sup>b</sup>                                           | FFP                           | Frail: 21%; pre-frail: 48% (overall)<br>Frail: 6%; pre-frail: 41% (men)<br>Frail: 23%; pre-frail: 49% (women)  |
| Das et al., 2019 [34]                 | Sydney, men aged ≥ 70y                   | N = 330<br>100% men, 81.4 ± 4.6y                                                        | FFP                           | Frail: 6.4% (3y incidence)<br>Pre-frail: 53% (3y incidence)                                                    |
| Dent et al., 2015 [35]                | Rural South Australia, adults aged ≥ 65y | N = 1501<br>45% men, 75.9±7.9y                                                          | FI                            | Frail: 25% (overall)<br>Frail: 29% (women)<br>Frail: 21% (men)                                                 |
| Tembo et al., 2020 [36]               | Gelong, adults aged ≥ 60y                | N = 707<br>49% men, 71.0 (65.2–77.5)y <sup>b</sup>                                      | FFP                           | Frail: 16% (overall)<br>Frail: 13%; pre-frail: 48% (men)<br>Frail: 18%; pre-frail: 54% (women)                 |
| Widagdo et al., 2015 [37]             | South Australia, adults aged ≥ 70y       | N = 2087<br>51% men, 78.2 ± 6.7y                                                        | FI, PFS, FFP, SFP             | Frail: 35% (identified by 1 measure); 1% (by all measures).<br>Frail: 18% (FI); 49% (PFS); 2% (FFP); 9% (SFP)  |
| <b>Frailty and sarcopenia studies</b> |                                          |                                                                                         |                               |                                                                                                                |
| Thompson, Solomon et al., 2021 [38]   | North-West Adelaide, adults aged ≥ 65y   | N = 716<br>45% men, 74.1 ± 6.1y                                                         | FFP, EWGSOP1                  | Frail and sarcopenic: 3%<br>Frail: 16%<br>Sarcopenic: 4%                                                       |
| <b>Sarcopenia studies</b>             |                                          |                                                                                         |                               |                                                                                                                |
| Hirani et al., 2015 [39]              | Sydney, men aged ≥ 70y                   | N = 1678<br>100% men, 77y                                                               | FNIH                          | Sarcopenia I: 14%<br>Sarcopenia II: 5%<br>Sarcopenia III: 4%                                                   |
| Sim et al., 2019 [40]                 | Perth, older women                       | N = 903<br>0% men, 79.9±2.6y                                                            | FNIH, FNIH2, EWGSOP1, EWGSOP2 | Sarcopenia: 9% (FNIH); 12% (FNIH2); 24% (EWGSOP1); 11% (EWGSOP2)                                               |
| Sui et al., 2021 [41, 42]             | Geelong, adults aged ≥ 60y               | N = 665<br>51% male, 70 (64–75) <sup>b</sup> y (women); 70 (66–78) <sup>b</sup> y (men) | EWGSOP1, EWGSOP2, FNIH        | Sarcopenic men: 3% (EWGSOP), 1% (EWGSOP2), 1% (FNIH)<br>Sarcopenic women: 6 % (EWGSOP1), 2% (EWGSOP2), 4% FNIH |
| Villani et al., 2020 [43]             | Queensland, adults aged ≥ 50y with T2DM  | N = 87 (67% men)<br>71.2 ± 8.2y                                                         | EWGSOP1, EWGSOP2              | Sarcopenia: 7% (EWGSOP1); 2% (EWGSOP2)                                                                         |

EWGSOP1: European Working Group on Sarcopenia in Older People; EWGSOP2: Adapted EWGSOP1; FFP: Modified Fried Frailty Phenotype; FI: Frailty Index; FNIH: United States Foundation for the National Institutes of Health; FNIH2: Adapted FNIH; SFP: Simplified Frailty Phenotype; MNA®-SF: Mini Nutritional Assessment Short Form; PFS: Prognostic Frailty Score; Sarcopenia I: low appendicular lean mass alone; Sarcopenia II: low ALM with weakness; Sarcopenia III: sarcopenia with weakness and poor gait speed. SCREEN©: Seniors in the Community Risk Evaluation for Eating and Nutrition questionnaire; SCREEN© II: Modified version of SCREEN©; y: years.

<sup>a</sup> In Australia and New Zealand

\* Data only extracted for New Zealand dataset

<sup>a</sup> Mean (+/- standard deviation) unless otherwise indicated: <sup>b</sup> Median (IQR).
